# Supplementary material for: Birnaviridae Virus Factories Show Features of Liquid-Liquid Phase Separation and Are Distinct from Paracrystalline Arrays of Virions Observed by Electron Microscopy
Source: PubMed Central journal article supplement (PMC8941928; doi:10.1128/jvi.02024-21), 2022-03-23
Supplement: jvi.02024-21-s0004.pdf [file jvi.02024-21-s0004.pdf]

1 **Movie S1. IBDV virus factories were present in infected, mock-treated cells**  
2 **imaged live.** DF-1 cells were transfected with GFP1-10 and infected with the  
3 PBG98-VP1-GFP11 virus. Infected cells were mock-treated with media 16hpi and  
4 imaged live over a time course of 17 minutes. Fifty z-stacks were imaged in total,  
5 with each stack being acquired at an interval of 20 seconds.

6

7 **Movie S2. IBDV virus factories dissolved in infected cells treated with 4%**  
8 **1,6-hexanediol and imaged live.** DF-1 cells were transfected with GFP1-10 and  
9 infected with the PBG98-VP1-GFP11 virus. Infected cells were treated with a  
10 solution of 4% 1,6-hexanediol 16hpi and imaged live over a time course of 17  
11 minutes. Fifty z-stacks were imaged in total, with each stack being acquired at an  
12 interval of 20 seconds.

13

14 **Movie S3. Paracrystalline arrays of virions detected by electron**  
15 **tomography.** DF-1 cells were infected with IBDV strain PBG98 and prepared for  
16 TEM 18hpi. Serial electron microscopy datasets were collected every 1° over a 120°  
17 tilt series and reconstructed. 10nm gold antibodies acted as fiducial markers.

18

19

20
